# Supplementary material
Source: PubMed Central journal article supplement (PMC7017454)
Supplement: NIHMS1550329-supplement-Supplement1.pdf [file NIHMS1550329-supplement-Supplement1.pdf]

## **Supplementary Material**

Droplet Digital PCR Quantification of Norovirus and Adenovirus in Decentralized Wastewater and Graywater Collections: Implications for Onsite Reuse

*Michael A. Jahne, Nichole E. Brinkman, Scott P. Keely, Brian D. Zimmerman, Emily A. Wheaton, Jay L. Garland*

## **Contents**

Page S2: Figure S1. qPCR Standard Curves

Page S3: Figure S2. Threshold Plots for Selected ddPCR Settings

Page S4: Table S1. Droplet counts for ddPCR

Page S6: Table S2. Complete PCR Results

## **Abbreviations**

AdV adenovirus

BDL below limit of detection

BLQ below limit of quantification

C<sub>q</sub> quantification cycle

ddPCR droplet digital polymerase chain reaction

NoVGI norovirus genogroup I

NoVGII norovirus genogroup II

NTC no-template control

qPCR quantitative polymerase chain reaction

Figure S1. qPCR Standard Curves

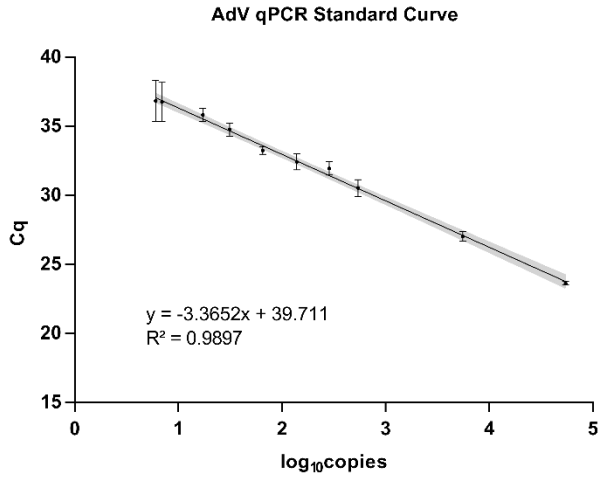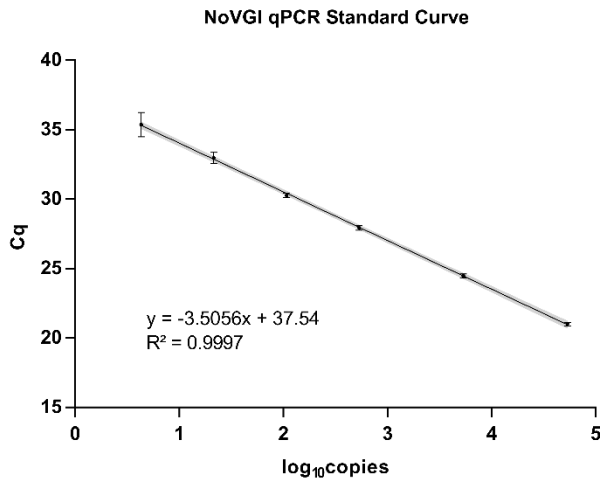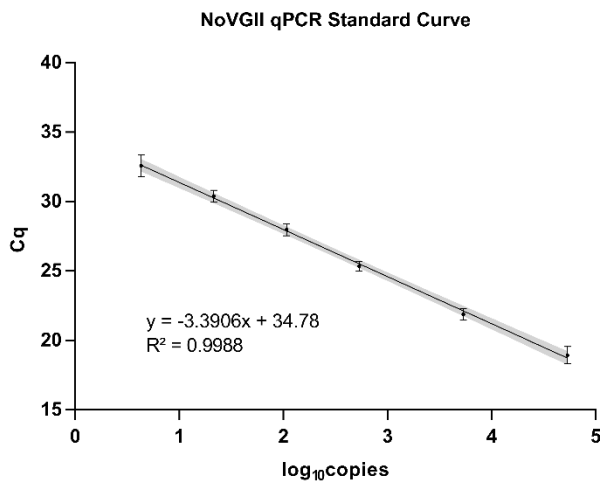

## Figure S2. Threshold Plots for Selected ddPCR Settings

Threshold settings were 0.9995 for AdV (top); 0.99995 for NoVGI (center); and 0.9999995 with block size 100 for NoVGII (bottom). Left and right panels represent negative and positive controls, respectively.

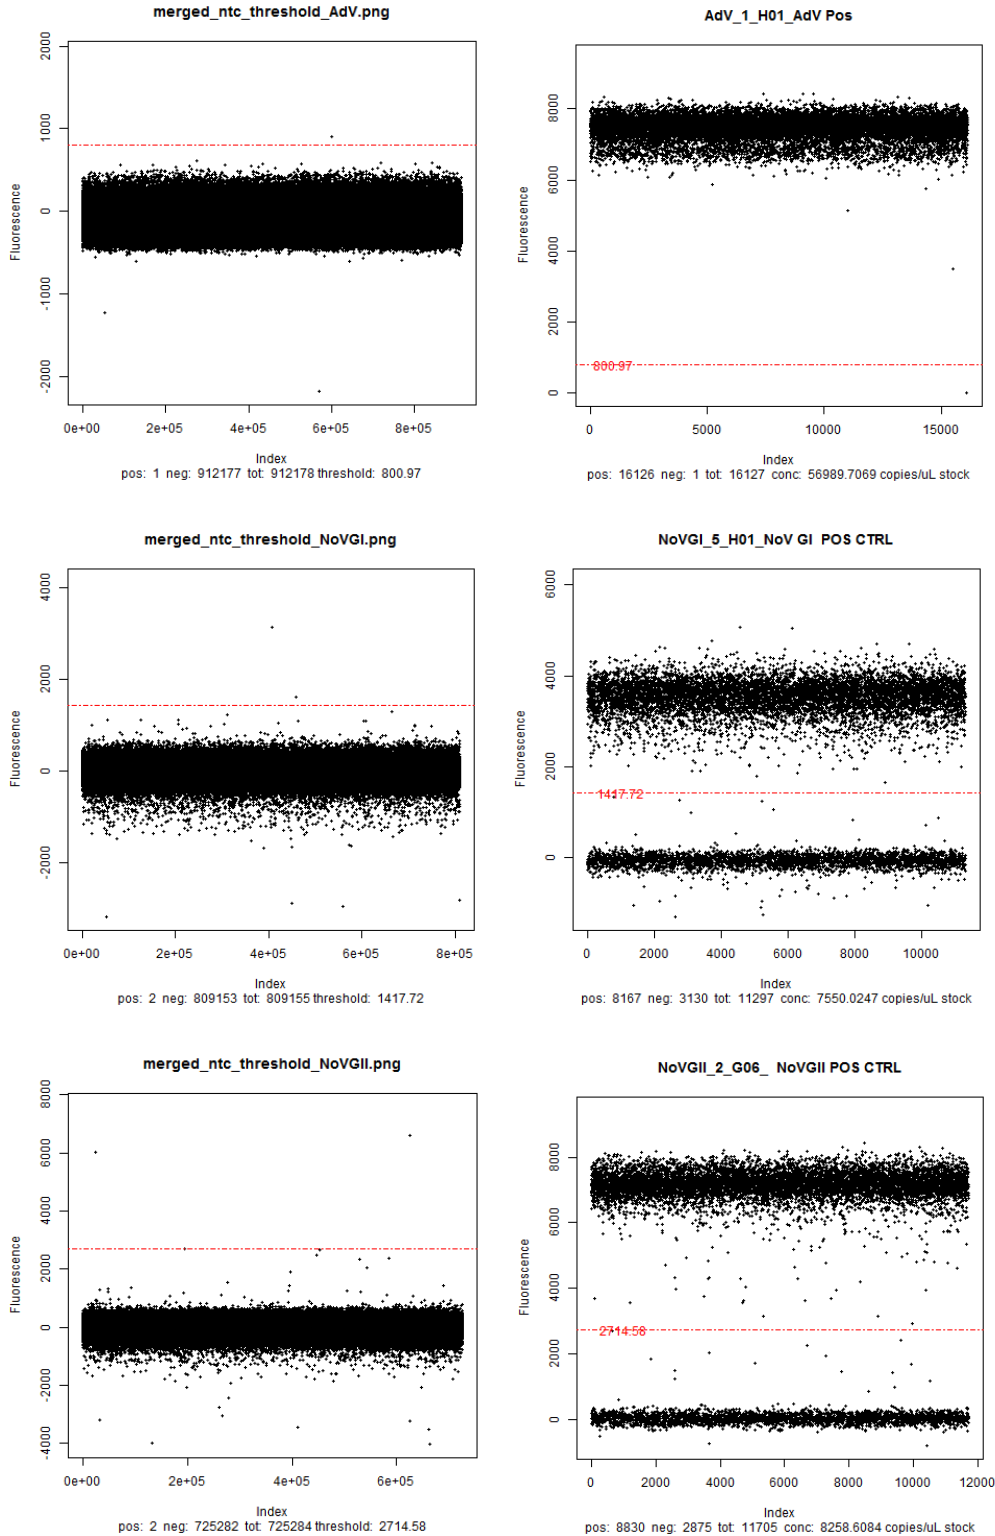

**Table S1. Droplet counts for ddPCR**

Total positive (+) and negative (-) droplet counts from 3 pooled ddPCR wells for each sample (9 wells for WW1 from 2017). Also shown are merged negative (NTC) and positive (POS) controls (varying number of wells per assay). Refer to main text for sample site descriptions.

| Site | Date       | AdV (+) | AdV (-) | NoVGI (+) | NoVGI (-) | NoVGII (+) | NoVGII (-) |
|------|------------|---------|---------|-----------|-----------|------------|------------|
| NTC  | n/a        | 1       | 912177  | 2         | 809153    | 2          | 725282     |
| POS  | n/a        | 240827  | 61      | 138274    | 53916     | 150870     | 41907      |
| WW1  | 1/11/2016  | 0       | 36987   | 0         | 29854     | 4301       | 34886      |
| WW1  | 1/13/2016  | 0       | 43614   | 0         | 32633     | 916        | 29171      |
| WW1  | 1/20/2016  | 1       | 39423   | 2         | 35386     | 1126       | 35383      |
| WW1  | 1/27/2016  | 1       | 38534   | 0         | 32198     | 430        | 31835      |
| WW1  | 2/1/2016   | 1       | 38983   | 18        | 27148     | 3710       | 30347      |
| WW1  | 2/3/2016   | 0       | 43578   | 1         | 37720     | 2224       | 41065      |
| WW1  | 2/8/2016   | 1       | 43015   | 0         | 34480     | 288        | 40887      |
| WW1  | 2/10/2016  | 0       | 42030   | 0         | 35690     | 32438      | 1628       |
| WW1  | 2/16/2016  | 0       | 44695   | 0         | 31062     | 26761      | 6996       |
| WW1  | 2/17/2016  | 0       | 44129   | 0         | 37348     | 27085      | 6354       |
| WW1  | 2/22/2016  | 1       | 43227   | 3         | 33099     | 868        | 30143      |
| WW1  | 2/24/2016  | 2       | 40584   | 2         | 38387     | 15547      | 19590      |
| WW1  | 2/29/2016  | 0       | 39615   | 1         | 28612     | 4642       | 24544      |
| WW1  | 3/2/2016   | 0       | 42897   | 0         | 40416     | 3737       | 28586      |
| WW1  | 3/7/2016   | 0       | 41323   | 0         | 42160     | 1062       | 33921      |
| WW1  | 3/9/2016   | 0       | 40783   | 0         | 34463     | 1661       | 30778      |
| WW1  | 3/14/2016  | 0       | 45482   | 0         | 35938     | 6211       | 25713      |
| WW1  | 3/16/2016  | 0       | 41634   | 0         | 42298     | 3699       | 36774      |
| WW1  | 3/21/2016  | 0       | 45196   | 4         | 36965     | 995        | 39433      |
| WW1  | 3/23/2016  | 0       | 38942   | 2         | 33920     | 547        | 37003      |
| WW1  | 3/28/2016  | 0       | 42966   | 0         | 36587     | 1          | 33767      |
| WW1  | 3/30/2016  | 2       | 42494   | 1         | 41113     | 15743      | 18519      |
| WW1  | 4/4/2016   | 0       | 41287   | 8         | 34739     | 24138      | 6728       |
| WW1  | 4/6/2016   | 1       | 40287   | 4         | 36198     | 13460      | 22000      |
| WW1  | 6/12/2017  | 3       | 130320  | 3         | 103235    | 22547      | 89980      |
| WW1  | 6/19/2017  | 2       | 81312   | 17        | 82026     | 1728       | 79965      |
| WW1  | 6/26/2017  | 2       | 121953  | 4         | 112687    | 924        | 119726     |
| WW1  | 7/10/2017  | 15      | 119391  | 0         | 120294    | 861        | 103960     |
| GW1  | 12/16/2014 | 0       | 36455   | 0         | 26080     | 1          | 28165      |
| GW1  | 12/18/2014 | 0       | 39481   | 0         | 26795     | 1          | 31614      |
| GW1  | 1/6/2015   | 1       | 39789   | 0         | 24357     | 0          | 29292      |
| GW1  | 1/8/2015   | 0       | 45645   | 0         | 28566     | 0          | 29445      |
| GW1  | 1/12/2015  | 0       | 44574   | 0         | 29136     | 0          | 32299      |
| GW1  | 1/13/2015  | 0       | 41839   | 0         | 29958     | 0          | 34194      |
| GW1  | 1/21/2015  | 0       | 44111   | 0         | 29777     | 0          | 31925      |

|     |           |    |       |   |       |   |       |
|-----|-----------|----|-------|---|-------|---|-------|
| GW1 | 1/22/2015 | 0  | 48068 | 0 | 30101 | 0 | 32624 |
| GW1 | 1/26/2015 | 0  | 44016 | 0 | 29430 | 3 | 31655 |
| GW1 | 1/28/2015 | 1  | 42232 | 0 | 34707 | 2 | 35191 |
| GW1 | 2/4/2015  | 0  | 42356 | 0 | 32489 | 0 | 35547 |
| GW1 | 2/5/2015  | 0  | 50059 | 0 | 33336 | 0 | 31976 |
| GW1 | 2/9/2015  | 0  | 44009 | 0 | 28893 | 1 | 30779 |
| GW1 | 2/11/2015 | 0  | 41372 | 0 | 31229 | 0 | 32302 |
| GW1 | 2/17/2015 | 0  | 46271 | 0 | 33703 | 0 | 35945 |
| GW1 | 2/19/2015 | 0  | 44801 | 0 | 30867 | 1 | 31259 |
| GW1 | 2/23/2015 | 0  | 42253 | 0 | 29877 | 0 | 31181 |
| GW1 | 2/25/2015 | 0  | 41513 | 0 | 37967 | 1 | 33466 |
| GW1 | 3/3/2015  | 6  | 44013 | 0 | 31595 | 1 | 31401 |
| GW1 | 3/4/2015  | 8  | 44610 | 0 | 33477 | 1 | 30972 |
| GW1 | 3/10/2015 | 0  | 39743 | 0 | 37669 | 0 | 30533 |
| GW1 | 3/12/2015 | 2  | 43323 | 1 | 39867 | 1 | 35474 |
| GW1 | 3/16/2015 | 35 | 47267 | 1 | 35279 | 1 | 32123 |
| GW1 | 3/18/2015 | 10 | 46105 | 0 | 28691 | 0 | 32431 |
| GW1 | 3/24/2015 | 0  | 45485 | 0 | 32845 | 0 | 30710 |
| GW1 | 3/25/2015 | 0  | 39739 | 0 | 31974 | 0 | 33866 |
| GW1 | 3/31/2015 | 1  | 45268 | 0 | 34968 | 2 | 34201 |
| GW1 | 4/2/2015  | 0  | 45755 | 0 | 29708 | 0 | 29908 |
| GW1 | 4/6/2015  | 0  | 39618 | 0 | 34634 | 0 | 35957 |
| GW1 | 4/8/2015  | 1  | 39163 | 0 | 30166 | 0 | 36130 |
| GW1 | 4/15/2015 | 0  | 49919 | 1 | 35618 | 0 | 27052 |
| GW1 | 4/20/2015 | 0  | 43519 | 0 | 33882 | 0 | 30696 |
| GW1 | 4/22/2015 | 1  | 37766 | 0 | 36850 | 0 | 34178 |
| GW2 | 2/22/2016 | 1  | 43841 | 0 | 33548 | 0 | 31599 |
| GW2 | 2/24/2016 | 0  | 43744 | 0 | 41584 | 0 | 32027 |
| GW2 | 2/29/2016 | 0  | 44005 | 0 | 36680 | 0 | 40309 |
| GW2 | 3/7/2016  | 5  | 43599 | 0 | 35054 | 0 | 38306 |
| GW2 | 3/14/2016 | 2  | 46291 | 1 | 41425 | 0 | 32583 |
| GW2 | 3/16/2016 | 0  | 45666 | 0 | 39520 | 1 | 39079 |
| GW2 | 3/30/2016 | 0  | 45582 | 0 | 34030 | 1 | 37540 |
| GW2 | 4/4/2016  | 0  | 43839 | 0 | 33677 | 0 | 38469 |
| GW2 | 4/6/2016  | 0  | 48410 | 0 | 34066 | 0 | 32211 |
| GW2 | 4/11/2016 | 1  | 41681 | 0 | 37929 | 0 | 39026 |
| GW2 | 4/13/2016 | 0  | 42414 | 0 | 38885 | 0 | 37770 |
| GW2 | 4/18/2016 | 0  | 42794 | 0 | 34380 | 0 | 37044 |
| GW2 | 4/20/2016 | 0  | 44656 | 0 | 34480 | 0 | 34464 |
| GW2 | 4/25/2016 | 0  | 42870 | 0 | 33294 | 0 | 29911 |
| GW2 | 4/27/2016 | 0  | 46806 | 0 | 40252 | 0 | 36321 |
| GW2 | 5/2/2016  | 0  | 44845 | 0 | 35614 | 1 | 28300 |
| GW2 | 5/4/2016  | 0  | 46159 | 0 | 36311 | 0 | 30408 |

**Table S2. Complete PCR Results**

Units are log<sub>10</sub> genome copies/L. BLD indicates non-detection and BLQ indicates putative detection beyond the qPCR standard curve range of quantification or within the 95% credible interval of ddPCR NTCs. Refer to main text for sample site descriptions.

| Site | Date       | AdV-qPCR | AdV-ddPCR | NoVGI-qPCR | NoVGI-ddPCR | NoVGII-qPCR | NoVGII-ddPCR |
|------|------------|----------|-----------|------------|-------------|-------------|--------------|
| WW1  | 1/11/2016  | BLD      | BLD       | BLD        | BLD         | 5.93        | 6.12         |
| WW1  | 1/13/2016  | BLD      | BLD       | BLD        | BLD         | 5.43        | 5.53         |
| WW1  | 1/20/2016  | BLD      | BLQ       | BLD        | 2.13        | 5.46        | 5.54         |
| WW1  | 1/27/2016  | BLQ      | BLQ       | BLD        | BLD         | 5.54        | 5.46         |
| WW1  | 2/1/2016   | BLQ      | BLQ       | BLD        | 3.98        | 6.28        | 6.42         |
| WW1  | 2/3/2016   | BLQ      | BLD       | BLD        | BLQ         | 6.05        | 6.08         |
| WW1  | 2/8/2016   | BLD      | BLQ       | BLD        | BLD         | 4.89        | 5.17         |
| WW1  | 2/10/2016  | BLQ      | BLD       | BLD        | BLD         | 7.64        | 7.85         |
| WW1  | 2/16/2016  | BLQ      | BLD       | BLQ        | BLD         | 7.32        | 7.56         |
| WW1  | 2/17/2016  | BLD      | BLD       | BLD        | BLD         | 7.53        | 7.59         |
| WW1  | 2/22/2016  | 4.26     | BLQ       | BLQ        | 2.78        | 5.59        | 5.80         |
| WW1  | 2/24/2016  | 4.02     | 2.38      | BLQ        | 2.41        | 6.87        | 7.13         |
| WW1  | 2/29/2016  | BLQ      | BLD       | BLD        | BLQ         | 6.36        | 6.60         |
| WW1  | 3/2/2016   | BLD      | BLD       | BLD        | BLD         | 6.56        | 6.45         |
| WW1  | 3/7/2016   | BLD      | BLD       | BLD        | BLD         | 5.80        | 5.83         |
| WW1  | 3/9/2016   | BLD      | BLD       | BLD        | BLD         | 5.55        | 6.07         |
| WW1  | 3/14/2016  | BLD      | BLD       | BLD        | BLD         | 6.53        | 6.70         |
| WW1  | 3/16/2016  | BLQ      | BLD       | BLD        | BLD         | 6.33        | 6.34         |
| WW1  | 3/21/2016  | BLD      | BLD       | BLQ        | 2.93        | 5.78        | 5.74         |
| WW1  | 3/23/2016  | BLD      | BLD       | BLD        | 2.46        | 5.66        | 5.50         |
| WW1  | 3/28/2016  | BLD      | BLD       | BLD        | BLD         | BLD         | BLQ          |
| WW1  | 3/30/2016  | BLD      | 2.36      | BLD        | BLQ         | 7.32        | 7.15         |
| WW1  | 4/4/2016   | BLD      | BLD       | BLD        | 3.41        | 7.61        | 7.55         |
| WW1  | 4/6/2016   | BLQ      | BLQ       | BLD        | 2.94        | 7.14        | 7.04         |
| WW1  | 6/12/2017  | BLQ      | 2.18      | BLQ        | 2.28        | 6.55        | 6.72         |
| WW1  | 6/19/2017  | BLQ      | BLQ       | BLD        | 3.47        | 5.45        | 5.68         |
| WW1  | 6/26/2017  | BLQ      | BLQ       | BLQ        | 2.45        | 5.30        | 5.23         |
| WW1  | 7/10/2017  | BLQ      | 3.24      | BLQ        | BLD         | 5.33        | 5.26         |
| GW1  | 12/16/2014 | BLD      | BLD       | BLQ        | BLD         | BLD         | BLQ          |
| GW1  | 12/18/2014 | BLD      | BLD       | BLD        | BLD         | BLD         | BLQ          |
| GW1  | 1/6/2015   | BLD      | BLQ       | BLD        | BLD         | BLQ         | BLD          |
| GW1  | 1/8/2015   | BLD      | BLD       | BLD        | BLD         | BLQ         | BLD          |
| GW1  | 1/12/2015  | BLD      | BLD       | BLD        | BLD         | BLD         | BLD          |
| GW1  | 1/13/2015  | BLD      | BLD       | BLQ        | BLD         | BLD         | BLD          |
| GW1  | 1/21/2015  | BLD      | BLD       | BLD        | BLD         | BLD         | BLD          |
| GW1  | 1/22/2015  | BLD      | BLD       | BLD        | BLD         | BLQ         | BLD          |

|     |           |      |      |     |     |     |      |
|-----|-----------|------|------|-----|-----|-----|------|
| GW1 | 1/26/2015 | BLD  | BLD  | BLD | BLD | BLQ | 2.50 |
| GW1 | 1/28/2015 | BLQ  | BLQ  | BLD | BLD | BLQ | 2.14 |
| GW1 | 2/4/2015  | BLD  | BLD  | BLD | BLD | BLQ | BLD  |
| GW1 | 2/5/2015  | BLD  | BLD  | BLD | BLD | BLD | BLD  |
| GW1 | 2/9/2015  | BLD  | BLD  | BLD | BLD | BLD | BLQ  |
| GW1 | 2/11/2015 | BLD  | BLD  | BLD | BLD | BLD | BLD  |
| GW1 | 2/17/2015 | BLD  | BLD  | BLD | BLD | BLD | BLD  |
| GW1 | 2/19/2015 | BLD  | BLD  | BLD | BLD | BLD | BLQ  |
| GW1 | 2/23/2015 | BLD  | BLD  | BLD | BLD | BLD | BLD  |
| GW1 | 2/25/2015 | BLD  | BLD  | BLD | BLD | BLD | BLQ  |
| GW1 | 3/3/2015  | BLD  | 2.83 | BLD | BLD | BLQ | BLQ  |
| GW1 | 3/4/2015  | BLQ  | 3.00 | BLD | BLD | BLD | BLQ  |
| GW1 | 3/10/2015 | BLQ  | BLD  | BLD | BLD | BLQ | BLD  |
| GW1 | 3/12/2015 | BLQ  | 2.05 | BLD | BLQ | BLQ | BLQ  |
| GW1 | 3/16/2015 | 4.09 | 3.79 | BLD | BLQ | BLD | BLQ  |
| GW1 | 3/18/2015 | BLQ  | 3.12 | BLD | BLD | BLD | BLD  |
| GW1 | 3/24/2015 | BLD  | BLD  | BLD | BLD | BLD | BLD  |
| GW1 | 3/25/2015 | BLD  | BLD  | BLD | BLD | BLD | BLD  |
| GW1 | 3/31/2015 | BLQ  | BLQ  | BLD | BLD | BLD | 2.15 |
| GW1 | 4/2/2015  | BLD  | BLD  | BLD | BLD | BLD | BLD  |
| GW1 | 4/6/2015  | BLD  | BLD  | BLD | BLD | BLD | BLD  |
| GW1 | 4/8/2015  | BLD  | BLQ  | BLD | BLD | BLD | BLD  |
| GW1 | 4/15/2015 | BLD  | BLD  | BLD | BLQ | BLD | BLD  |
| GW1 | 4/20/2015 | BLD  | BLD  | BLD | BLD | BLD | BLD  |
| GW1 | 4/22/2015 | BLQ  | BLQ  | BLD | BLD | BLD | BLD  |
| GW2 | 2/22/2016 | BLD  | BLQ  | BLD | BLD | BLD | BLD  |
| GW2 | 2/24/2016 | BLD  | BLD  | BLD | BLD | BLD | BLD  |
| GW2 | 2/29/2016 | BLD  | BLD  | BLD | BLD | BLD | BLD  |
| GW2 | 3/7/2016  | BLQ  | 2.71 | BLD | BLD | BLQ | BLD  |
| GW2 | 3/14/2016 | BLD  | 2.03 | BLD | BLQ | BLQ | BLD  |
| GW2 | 3/16/2016 | BLD  | BLD  | BLD | BLD | BLQ | BLQ  |
| GW2 | 3/30/2016 | BLD  | BLD  | BLD | BLD | BLQ | BLQ  |
| GW2 | 4/4/2016  | BLD  | BLD  | BLD | BLD | BLD | BLD  |
| GW2 | 4/6/2016  | BLD  | BLD  | BLD | BLD | BLD | BLD  |
| GW2 | 4/11/2016 | BLD  | BLQ  | BLD | BLD | BLD | BLD  |
| GW2 | 4/13/2016 | BLD  | BLD  | BLD | BLD | BLD | BLD  |
| GW2 | 4/18/2016 | BLD  | BLD  | BLD | BLD | BLD | BLD  |
| GW2 | 4/20/2016 | BLD  | BLD  | BLD | BLD | BLQ | BLD  |
| GW2 | 4/25/2016 | BLD  | BLD  | BLD | BLD | BLQ | BLD  |
| GW2 | 4/27/2016 | BLD  | BLD  | BLD | BLD | BLQ | BLD  |
| GW2 | 5/2/2016  | BLD  | BLD  | BLD | BLD | BLD | BLQ  |
| GW2 | 5/4/2016  | BLD  | BLD  | BLD | BLD | BLD | BLD  |
